# Supplementary material for: Sulforaphane Exerts Beneficial Immunomodulatory Effects on Liver Tissue via a Nrf2 Pathway-Related Mechanism in a Murine Model of Hemorrhagic Shock and Resuscitation
Source: PubMed Central journal article supplement (PMC8866169; doi:10.3389/fimmu.2022.822895), 2022-02-10
Supplement: DataSheet_1.pdf [file DataSheet_1.pdf]

*Supplementary Material*

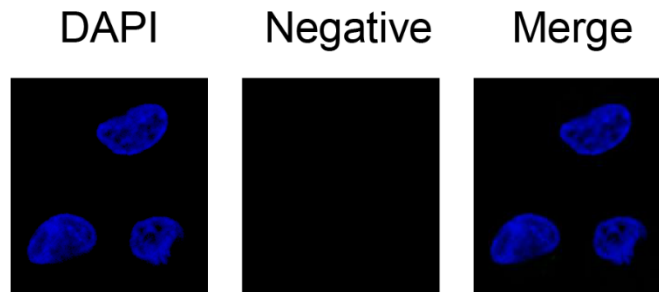

**Supplementary Figure S1.** Negative control of Kupffer cells' immunofluorescence.

**Supplementary Table S1 Blood withdrawal**

| <b>Group</b> | <b>HS/R (mL)</b> |          |          |          |          |          | <b>HS/R+SFN (mL)</b> |          |          |          |          |          |
|--------------|------------------|----------|----------|----------|----------|----------|----------------------|----------|----------|----------|----------|----------|
|              | <b>1</b>         | <b>2</b> | <b>3</b> | <b>4</b> | <b>5</b> | <b>6</b> | <b>1</b>             | <b>2</b> | <b>3</b> | <b>4</b> | <b>5</b> | <b>6</b> |
| <b>6h</b>    | 0.6              | 0.65     | 0.74     | 0.8      | 0.84     | 0.74     | 0.69                 | 0.88     | 0.85     | 0.84     | 0.9      | 0.74     |
| <b>24h</b>   | 0.65             | 0.84     | 0.74     | 0.79     | 0.71     | 0.89     | 0.65                 | 0.71     | 0.63     | 0.81     | 0.71     | 0.76     |
| <b>72h</b>   | 0.69             | 0.8      | 0.85     | 0.71     | 0.69     | 0.79     | 0.77                 | 0.74     | 0.71     | 0.64     | 0.69     | 0.74     |
